# Supplementary material for: miR167d-ARFs Module Regulates Flower Opening and Stigma Size in Rice
Source: Rice (N Y). 2022 Jul 25;15:40. doi: 10.1186/s12284-022-00587-z (PMC9314575; doi:10.1186/s12284-022-00587-z)
Supplement: Supplementary file 1 — Additional file 1: Table S1. The Primers used in this study. [file 12284_2022_587_MOESM1_ESM.xlsx]

## Sheet: Sheet1
Table S1. The primers and probes used in this study
Primers	Sequence(5'-3')	Objective	Note
ARF12-F RT	CTTTTGGGGGCTCGGTTTTG	RT-qPCR
ARF12-R RT	GGTTTTGCACATCACGACCA	RT-qPCR
ARF25-F RT	CAGTTGGTTCGTGGTGGAGA	RT-qPCR
ARF25-R RT	CAGAATAGTCGTCGCAGGCA	RT-qPCR
ARF6-F RT	TACGATCACTTCTCGCCCAC	RT-qPCR
ARF6-R RT	TTCCAGGCAGTGGTGCTAAC	RT-qPCR
ARF17-F RT	CCTTGAGGGCCAGTTGGAAA	RT-qPCR
ARF17-R RT	GCAGGAGACGCTATTCACGA	RT-qPCR
ubi-F for RT	GCCCAAGAAGAAGATCAAGAAC	RT-qPCR
ubi-R for RT	AGATAACAACGGAAGCATAAAAGTC	RT-qPCR
miR167d	TGAAGCTGCCAGCATGATCTG	RT-qPCR
U6 RT-F	CGATAAAATTGGAACGATACAGA	RT-qPCR
U6 RT-R	ATTTGGACCATTTCTCGATTTGT	RT-qPCR
PRGEB32-S5AD5-F	CGGGTCTCAggcaACAAAGCACCAGTGG	Make construct	For knocknot
PRGEB32-S3AD5-R	TAGGTCTCCaaacAAAAAAAAAAGCACCGACTCG	Make construct	For knocknot
ARF6-gR1-F	TAGGTCTCCCTCAAGAGTTGAgttttagagctagaa	Make construct	For knocknot
ARF6-gR1-R	CGGGTCTCATGAGCTGGAGGCtgcaccagccggg	Make construct	For knocknot
ARF6-gR2-F	TAGGTCTCCCGGTCGGTAGTCgttttagagctagaa	Make construct	For knocknot
ARF6-gR2-R	CGGGTCTCAACCGCAGGCAGCtgcaccagccggg	Make construct	For knocknot
ARF17-gR1-F	TAGGTCTCCACATTGTGAAGTgttttagagctagaa	Make construct	For knocknot
ARF17-gR1-R	CGGGTCTCAATGTGACGATGCtgcaccagccggg	Make construct	For knocknot
ARF17-gR2-F	TAGGTCTCCAACCACTTAGCCgttttagagctagaa	Make construct	For knocknot
ARF17-gR2-R	CGGGTCTCAGGTTGTAGCGTCtgcaccagccggg	Make construct	For knocknot
ARF6/12-gR1-F	TAGGTCTCCCGTTCTTCTAGTgttttagagctagaa	Make construct	For knocknot
ARF6/12-gR1-R	CGGGTCTCAAACGTCGTCCTCtgcaccagccggg	Make construct	For knocknot
ARF6/12-gR2-F	TAGGTCTCCTCCCGCGGAGATgttttagagctagaa	Make construct	For knocknot
ARF6/12-gR2-R	CGGGTCTCAGGGAAGGTACGCtgcaccagccggg	Make construct	For knocknot

## Sheet: Sheet2
NbACO-RT-F	GGATTTGCTCTGTGAAAATCTT	RT-qPCR
NbACO-RT-R	AGGATTATGCCACCAGCGTC	RT-qPCR
NbEIN2-F-RT	GGCAGCAAAAATCAAGCCCCC	RT-qPCR
NbEIN2-R-RT	CTGAAAGGGGCTGCTGAAG	RT-qPCR
RT-NbERF1-F	AAAGTGCGAGTCCGAAGAGG	RT-qPCR
RT-NbERF1-R	TCTCCGCTGAAAATGTCCCC	RT-qPCR
RT-NbERF3-F	GCAGAACGCGCCCTTCGAG	RT-qPCR
RT-NbERF3-R	ATCGGCGTTACATGGTAAGGCT	RT-qPCR
ACT2F	GTGATGAAGCACAATCCAAGAGA	RT-qPCR
ACT2R	TCAGTAAGGTCACGTCCAGCAA	RT-qPCR
RPW8.1 P-F for RT	ATAGGGGCTGTTCTTGGAGTTG	RT-qPCR
RPW8.1 P-R for RT	TTGTCTGCGTCTGAGTTTCGG	RT-qPCR
ACS2-F for RT	TCATGGGAAAAGCTAGAGGTGGAAG	RT-qPCR
ACS2-R for RT	TCAACGGTTAATTTGAAATTGTCGG	RT-qPCR
AtACS6-RT-F	AAACCGATGGCTGCAACAACTATGA	RT-qPCR
AtACS6-RT-R	TAAGTCTGTGCACGGACTAGCGGAG	RT-qPCR
AtACS11-RT-F	CTGGTTTCGGGTCTAAAGGAAGCGG	RT-qPCR
AtACS11-RT-R	AATGACACGATGAGCCTGGAGAGATGTT	RT-qPCR
AtACO2-RT-F	GGATGTCGGTTGCATCGTTTTA	RT-qPCR
AtACO2-RT-R	TACGGCTGCTGTAGGATTCAGTTC	RT-qPCR
AtACO4-RT-F	CTACCTCAAGCACCTTCCCG	RT-qPCR
AtACO4-RT-R	TTCTCGCACAGCAGATCCAG	RT-qPCR
EIN2-RT-F	TGGAGGAGGAGGGTATGGTG	RT-qPCR
EIN2-RT-R	CACCAAACTGCTCAAAGGGC	RT-qPCR
EIN3-RT-F	CCGATTGGACCGACTCCTCATAC	RT-qPCR
EIN3-RT-R	ATAGCAAGCCAGGTAGCACTCTC	RT-qPCR
EIl1-RT-F	CAACACCGCATACGCTTCAG	RT-qPCR
EIl1-RT-R	GCCACCACTCTTCATTCCCA	RT-qPCR
ERF1-RT-1	TTAATTCAGTCCCCATTCTC	RT-qPCR
ERF1-RT-2	CCAAGTCCCACTATTTTCAG	RT-qPCR
ERF2-RT-1	TGATCCGGCGAAGAATGGAG	RT-qPCR
ERF2-RT-2	CAATAAAGCGCGGGAACCAC	RT-qPCR
ERF5-RT-1	TACTCGACGAGGCTTCTCCT	RT-qPCR
ERF5-RT-2	GGGCGAAAGAAGAGGACGAT	RT-qPCR
ERF016-RT-F	GGGAAAATGGGTGGCTGAGA	RT-qPCR
ERF016-RT-R	GGGGCCACGAAGACAGTAAA	RT-qPCR
ORA59-RT-F	CCGAGGAGGAGGAGAAGTCAT	RT-qPCR
ORA59-RT-R	GTGTCGAATGTCCCAAGCCA	RT-qPCR
ERF6-RT-F	ACTACTGCCACCACCAATCG	RT-qPCR
ERF6-RT-R	TGAACAGTAACGCGAGGAGG	RT-qPCR
PR1-RT-F	TACGCAGAACAACTAAGAGG	RT-qPCR
PR1-RT-R	TCGTTCACATAATTCCCACG	RT-qPCR
PR2-RT-F	TCGATGAGAATAAGAAGGAACCAAC	RT-qPCR
PR2-RT-R	ATAACAACATACTACACGCTGAAAG	RT-qPCR
PR3-RT-F	GGACCAATGCAACTGTCGTG	RT-qPCR
PR3-RT-R	ACGTCCACACTCCAATCCAC	RT-qPCR
PR4-RT-F	GCGGCAAGTGTTTAAGGGTG	RT-qPCR
PR4-RT-R	CAAATCCAAGCCTCCGTTGC	RT-qPCR
AtPDF12F	TCATGGCTAAGTTTGCTTCCA	RT-qPCR
AtPDF12R	ACATGGGACGTAACAGATACACT	RT-qPCR
FRK1F	TCTGAAGAATCAGCTCAAGGC	RT-qPCR
FRK1R	TGTTGGCTTCACATCTCTGTG	RT-qPCR
WRKY29F	TGGAGACAAGTGGCTTAGATG	RT-qPCR
WRKY29R	TGCGTCCGACAACAGATTCTC	RT-qPCR
RPW8.1- pGBKT7-EcoR1-F	TGGCCATGGAGGCCGAATTCATGCCGATTGGTGAGCTTGCGATA	Make construct	For Y2H analysis
RPW8.1- pGBKT7- BamH1-R	CGCTGCAGGTCGACGGATCCTCAAGCTCTTATTTTACTACAAGC	Make construct	For Y2H analysis
RPW8.2- pGBKT7-EcoR1-F	TGGCCATGGAGGCCGAATTCATGATTGCTGAGGTTGCCGCAG	Make construct	For Y2H analysis
RPW8.2- pGBKT7- BamH1-R	CGCTGCAGGTCGACGGATCCTCAAGAATCATCACTGCAGAACG	Make construct	For Y2H analysis
ACO4F-pGADT7-EcoR1-F	CCATGGAGGCCAGTGAATTCATGGAGAGTTTCCCGATCATCAA	Make construct	For Y2H analysis
ACO4F-pGADT7-BamH1-R	AGCTCGAGCTCGATGGATCCTCACGCAGTGGCCAATGGTCCA	Make construct	For Y2H analysis
ACO438-175-pGADT7-EcoR1-F	CCATGGAGGCCAGTGAATTCATGAACCATGGGATTTCACTCGA	Make construct	For Y2H analysis
ACO438-175-pGADT7-BamH1-R	AGCTCGAGCTCGATGGATCCTCATCGGAGACCCTTGACTAGGT	Make construct	For Y2H analysis
A4T1-pGADT7-EcoR1-F	CCATGGAGGCCAGTGAATTCATGTTCCCGATCATCAATCTCGA	Make construct	For Y2H analysis
A4T1-pGADT7-BamH1-R	AGCTCGAGCTCGATGGATCCTCACATTAACGTTCTGTAATCGT	Make construct	For Y2H analysis
A4T2-pGADT7-EcoR1-F	CCATGGAGGCCAGTGAATTCATGACTTTTGGAACCAAAGTCAG	Make construct	For Y2H analysis
A4T2-pGADT7-BamH1-R	AGCTCGAGCTCGATGGATCCTCACGGATTATAGAATGATGCGA	Make construct	For Y2H analysis
A4T3-pGADT7-EcoR1-F	CCATGGAGGCCAGTGAATTCATGAAAGACTTCGCCGGAAAGATAG	Make construct	For Y2H analysis
A4T3-pGADT7-BamH1-R	AGCTCGAGCTCGATGGATCCTCACGGTCTTTTCGACCCGTAAAA	Make construct	For Y2H analysis
A4T4-pGADT7-EcoR1-F	CCATGGAGGCCAGTGAATTCATGGGAAGCGACTCTGTTATTTTTCC	Make construct	For Y2H analysis
A4T4-pGADT7-BamH1-R	AGCTCGAGCTCGATGGATCCTCATCACGCAGTGGCCAATGGTC	Make construct	For Y2H analysis
ACO2-pGADT7-EcoR1-F	CCATGGAGGCCAGTGAATTCATGGAGAAGAACATGAAGTTTC	Make construct	For Y2H analysis
ACO2-pGADT7-BamH1-R	AGCTCGAGCTCGATGGATCCTTAGAAAGTCTCTACGGCTGCT	Make construct	For Y2H analysis
ACO1-pGADT7-EcoR1-F	CCATGGAGGCCAGTGAATTCATGGTTTTGATCAAAGAGAGAGAG	Make construct	For Y2H analysis
ACO1-pGADT7-BamH1-R	AGCTCGAGCTCGATGGATCCCTAGGCTGAATCCGCATTTCCCA	Make construct	For Y2H analysis
RPW8.1- BamH1-F	CGGGGATCCATGCCGATTGGTGAGCTTGCGAT	Make construct	For BiFC analysis
RPW8.1- Sal1-106-R	GCCGTCGACTCAAGCTCTTATTTTACTACAAGCA	Make construct	For BiFC analysis
RPW8.1- Sal1-104-R	GCCGTCGACAGCTCTTATTTTACTACAAGCA	Make construct	For BiFC analysis
ACO438-175- BamH1-F	CGGGGATCCATGAACCATGGGATTTCACTCGAGC	Make construct	For BiFC analysis
ACO438-175- Sal1-106-R	GCCGTCGACTTATCGGAGACCCTTGACTAGG	Make construct	For BiFC analysis
ACO438-175- Sal1-104-R	GCCGTCGACTCGGAGACCCTTGACTAGG	Make construct	For BiFC analysis
ACO4- BamH1-F	CGGGGATCCATGGAGAGTTTCCCGATCATCAAT	Make construct	For BiFC analysis
ACO4- Sal1-106-R	GCCGTCGACTCACGCAGTGGCCAATGGTCCA	Make construct	For BiFC analysis
ACO4- Sal1-104-R	GCCGTCGACCGCAGTGGCCAATGGTCCA	Make construct	For BiFC analysis
RPW8.1-BamH1-F	ACAGGATCCATGCCGATTGGTGAGCTTGCGATA	Make construct	For western blot
RPW8.1-Stu1-F	ACAAGGCCTAGCTCTTATTTTACTACAAGC	Make construct	For western blot
ACO4-BamH1-F	ACAGGATCCATGGAGAGTTTCCCGATCATCAA	Make construct	For western blot
ACO4-Stu1-R	ACAAGGCCTCGCAGTGGCCAATGGTCCA	Make construct	For western blot
ACO438-175-BamH1-F	ACAGGATCCATGAACCATGGGATTTCACTCGA	Make construct	For western blot
ACO438-175-Stu1-R	ACAAGGCCTTCGGAGACCCTTGACTAGGT	Make construct	For western blot
RPW8.1 Promoter-EcoR1-F	CACGAATTCATTGGTCTCTCAATTTGTTTATTTAGAA	Make construct	For LUC reporter analysis
RPW8.1 Promoter-Kpn1-R	CACGGTACCTTTTTGAAAGTAGTTGTTTAGCTCTC	Make construct	For LUC reporter analysis
EIL1-Kpn1-F	CACGGTACCATGATGATGTTTAACGAGATGGGA	Make construct	For LUC reporter analysis
EIL1-Pst1-R	ACACTGCAGTCAGAACCATATTGATACATCTTGC	Make construct	For LUC reporter analysis
ERF1-Kpn1-F	ACAGGTACCATGGATCCATTTTTAATTCAGTCCC	Make construct	For LUC reporter analysis
ERF1-Spe1-R	CACACTAGTTCACCAAGTCCCACTATTTTCAG	Make construct	For LUC reporter analysis
ORA59-Kpn1-F	ACAGGTACCATGGAATATCAAACTAACTTCTTAAGTG	Make construct	For LUC reporter analysis
ORA59-Spe1-R	CACACTAGTTCAAGAACATGATCTCATAAGCTCT	Make construct	For LUC reporter analysis
ERF2-Kpn1-F	ACAGGTACCATGTACGGACAGTGCAATATAGAATC	Make construct	For LUC reporter analysis
ERF2-Spe1-R	CACACTAGTTTATGAAACCAATAACTCATCAACACGT	Make construct	For LUC reporter analysis
ERF5-Kpn1-F	ACAGGTACCATGGCGACTCCTAACGAAGTATC	Make construct	For LUC reporter analysis
ERF5-Spe1-R	CACACTAGTTCAAACAACGGTCAACTGGGAAT	Make construct	For LUC reporter analysis
ERF6-Kpn1-F	ACAGGTACCATGGCTACACCAAACGAAGTATCA	Make construct	For LUC reporter analysis
ERF6-Spe1-R	CACACTAGTTCAAACAACGGTCAATTGTGGATAA	Make construct	For LUC reporter analysis
ERF016-Kpn1-F	ACAGGTACCATGGATGCATCCCCAAAGTACA	Make construct	For LUC reporter analysis
ERF016-Spe1-R	CACACTAGTTCAGAAATTCCAAAGGTTAATATTGTA	Make construct	For LUC reporter analysis
RPW8.1p-his2-EcoR1-F	ACGACTCACTATAGGGCGAATTCATTGGTCTCTCAATTTGTTTATTTAGAA	Make construct	For Y1H analysis
RPW8.1p-his2-Sac1-R	TCGATTCGCGAACGCGTGAGCTCTTTTTGAAAGTAGTTGTTTAGCTCTC	Make construct	For Y1H analysis
ERF6-rec2-Nde1-F	TACCAGATTACGCTCATATGATGGCTACACCAAACGAAGTATC	Make construct	For Y1H analysis
ERF6-rec2-EcoR1-R	CCACTGCTTGGGTGGAATTCTCAAACAACGGTCAATTGTGGATA	Make construct	For Y1H analysis
ERF016-rec2-Nde1-F	TACCAGATTACGCTCATATGATGGATGCATCCCCAAAGTAC	Make construct	For Y1H analysis
ERF016-rec2-EcoR1-R	CCACTGCTTGGGTGGAATTCTCAGAAATTCCAAAGGTTAATATTG	Make construct	For Y1H analysis
ORA59-rec2-Nde1-F	TACCAGATTACGCTCATATGATGGAATATCAAACTAACTTCTTAA	Make construct	For Y1H analysis
ORA59-rec2-EcoR1-R	CCACTGCTTGGGTGGAATTCTCAAGAACATGATCTCATAAGCT	Make construct	For Y1H analysis
RPW8.1p-his2-Sac1-R1	ATTCGCGAACGCGTGAGCTCGATCAAATCAAATGAGAAGAATCC	Make construct	For Y1H analysis
RPW8.1p-his2-EcoR1-F1	ACTCACTATAGGGCGAATTCGGATTCTTCTCATTTGATTTGATC	Make construct	For Y1H analysis
RPW8.1p-his2-Sac1-R2	ATTCGCGAACGCGTGAGCTCGAAATCTGAATTAGCCCAGAAT	Make construct	For Y1H analysis
RPW8.1p-his2-EcoR1-F2	ACTCACTATAGGGCGAATTCATTCTGGGCTAATTCAGATTTC	Make construct	For Y1H analysis
RPW8.1p-his2-Sac1-R3	ATTCGCGAACGCGTGAGCTCAATACTTTGCATGTTGCAGTATA	Make construct	For Y1H analysis
RPW8.1p-his2-EcoR1-F3	ACTCACTATAGGGCGAATTCTATACTGCAACATGCAAAGTATT	Make construct	For Y1H analysis
RPW8.1p-his2-Sac1-R4	ATTCGCGAACGCGTGAGCTCACGTCGAAGAAGCGAGAGTC	Make construct	For Y1H analysis
RPW8.1p-his2-EcoR1-F4	ACTCACTATAGGGCGAATTCGACTCTCGCTTCTTCGACGT	Make construct	For Y1H analysis
ORA59-pGEX-BamH1-F	TCCAGGGGCCCCTGGGATCCATGGAATATCAAACTAACTTCTTAA	Make construct
ORA59-pGEX-EcoR1-R	TCGAGTCGACCCGGGAATTCTCAAGAACATGATCTCATAAGCT	Make construct
ERF016-DT-BsF	ATATATGGTCTCGATTGGGCCTACGTTAGGGCAAGTGTTTTAGAGCTAGAAATAGC	Make knock out construct
ERF016-DT-BsR	ATTATTGGTCTCGAAACGGAATCTCCGGAGGATTGTCAATCTCTTAGTCGACTCTAC	Make knock out construct
ERF6-DT-BsF	ATATATGGTCTCGATTGTTTGAGACGGCGATCGAAGGTTTTAGAGCTAGAAATAGC	Make knock out construct
ERF6-DT-BsR	ATTATTGGTCTCGAAACTCAAATCCCAGTCATCTATCAATCTCTTAGTCGACTCTAC	Make knock out construct
ORA59-DT-BsF	ATATATGGTCTCGATTGGCTCTCGCTTATGATCAGGGTTTTAGAGCTAGAAATAGC	Make knock out construct
ORA59-DT-BsR	ATTATTGGTCTCGAAACCTGTATGACTTCTCCTCCTCAATCTCTTAGTCGACTCTAC	Make knock out construct
SALK_064286（ACO4）-LP	ATTGTTGGCCACAGTTGTCTC	Mutant identification
SALK_064286（ACO4）-RP	GAGATGGAGAGTTTCCCGATC	Mutant identification
SALK_027311（ACO2）-LP	CAGATCGGTTTAGCTGTACCG	Mutant identification
SALK_027311（ACO2）-RP	TCGAGAAGATGACAAAGGACC	Mutant identification
OBS1-F	ACGTAATTCAATAATATTCTACGTAATTTAATACTCACGACAACTTGCATAT	Probe	3`Biotin
OBS1-R	ATATGCAAGTTGTCGTGAGTATTAAATTACGTAGAATATTATTGAATTACGT	Probe	3`Biotin
OBS2-F	TTGCATATAGATCCAACGATCTCCTCTTACCTAGAAAAAGAGAGAGTTGTTGACCCGTA	Probe	3`Biotin
OBS2-R	TACGGGTCAACAACTCTCTCTTTTTCTAGGTAAGAGGAGATCGTTGGATCTATATGCAA	Probe	3`Biotin
OBS3-F	TATGAGTCAATCTCTTGAATTGTCTTCATATAATTAAAACCACTCGTTAACTTGTTAA	Probe	3`Biotin
OBS3-R	TTAACAAGTTAACGAGTGGTTTTAATTATATGAAGACAATTCAAGAGATTGACTCATA	Probe	3`Biotin
OBS4-F	ACATAAAACTATTTAATATGGTTCCATCCTTCCATGTACATAGATTCCTCT	Probe	3`Biotin
OBS4-R	AGAGGAATCTATGTACATGGAAGGATGGAACCATATTAAATAGTTTTATGT	Probe	3`Biotin
OBS5-F	ATGTACATAGATTCCTCTATATTCACCTCGAGAGCTAAACAACTACTTTCAAAAA	Probe	3`Biotin
OBS5-R	TTTTTGAAAGTAGTTGTTTAGCTCTCGAGGTGAATATAGAGGAATCTATGTACAT	Probe	3`Biotin
OBS1-Competitor-F	ACGTAATTCAATAATATTCTACGTAATTTAATACTCACGACAACTTGCATAT	Probe
OBS1-Competitor--R	ATATGCAAGTTGTCGTGAGTATTAAATTACGTAGAATATTATTGAATTACGT	Probe
OBS2-Competitor-F	TTGCATATAGATCCAACGATCTCCTCTTACCTAGAAAAAGAGAGAGTTGTTGACCCGTA	Probe
OBS2-Competitor-R	TACGGGTCAACAACTCTCTCTTTTTCTAGGTAAGAGGAGATCGTTGGATCTATATGCAA	Probe
Mutanr Competitor-Ⅴ-F	ACGTAATTCAAGAAGATTCTACGTAATTCAAGACTCACGACAACTTGCATAT	Probe
Mutanr Competitor-Ⅴ-R	ATATGCAAGTTGTCGTGAGTCTTGAATTACGTAGAATCTTCTTGAATTACGT	Probe
Mutanr Competitor-Ⅰ-F	TTGCAGACAGATCCAACGATCTCCTCTTACCTCGAAAAAGAGAGAGTTGTTGACCCGTA	Probe
Mutanr Competitor-Ⅰ-R	TACGGGTCAACAACTCTCTCTTTTTCGAGGTAAGAGGAGATCGTTGGATCTGTCTGCAA	Probe
Mutanr Competitor-Ⅱ-F	TTGCATATAGATCCAACGATCTCCTCTTACCTAGAAAAAGACACAGTTGTTGACCCGTA	Probe
Mutanr Competitor-Ⅱ-R	TACGGGTCAACAACTGTGTCTTTTTCTAGGTAAGAGGAGATCGTTGGATCTATATGCAA	Probe
Mutanr Competitor-Ⅲ-F	TTGCATATAGATCCAACGATCTCCTCTTACCTAGAAAAAGAGAGAGTTGTACACCCGTA	Probe
Mutanr Competitor-Ⅲ-R	TACGGGTGTACAACTCTCTCTTTTTCTAGGTAAGAGGAGATCGTTGGATCTATATGCAA	Probe
Mutanr Competitor-Ⅳ-F	TTGCATATAGATCCAACGATCTCGACTTACCTAGAAAAAGAGAGAGTTGTTGACCCGTA	Probe
Mutanr Competitor-Ⅳ-R	TACGGGTCAACAACTCTCTCTTTTTCTAGGTAAGTCGAGATCGTTGGATCTATATGCAA	Probe
